# Supplementary material for: Protein Phosphorylation in Serine Residues Correlates with Progression from Precancerous Lesions to Cervical Cancer in Mexican Patients
Source: Hindawi journal article supplement (doi:10.1155/2020/5058928), 2020-01-01
Supplement: f1 [file 5058928.f1.pdf]

Supplementary Table 1. List of proteins on common of serine phosphoproteins of CC group compared to non-phosphorylated proteins of control group.

| <b>NCBI-IP</b>                                                                                                                                                                                                                             | <b>Proteins CC (Phospho)/<br/>Control (No phospho)</b> | <b>Peptides<br/>count</b> | <b>Coverage (%)</b> | <b>Confidence<br/>score</b> |
|--------------------------------------------------------------------------------------------------------------------------------------------------------------------------------------------------------------------------------------------|--------------------------------------------------------|---------------------------|---------------------|-----------------------------|
| P60709<br>P63261<br>A0A2R8Y793<br>I3L1U9<br>I3L3I0<br>I3L4N8<br>P63267-2<br>A0A2R8YGF8<br>E7EVS6<br>G5E9R0<br>I3L3R2<br>J3KT65<br>K7EM38<br>A0A2R8YEA7<br>B8ZZJ2<br>C9JTX5<br>C9JUM1<br>C9JZR7<br>F8WB63<br>A0A2R8YFE2<br>F8WCH0<br>Q9BYX7 | Actin_ cytoplasmic 1                                   | 68                        | 2.933               | 272.4554                    |
| Q01518<br>Q01518-2<br>Q5T0R1                                                                                                                                                                                                               | Adenylyl cyclase-associated<br>protein 1               | 15                        | 5.89                | 75.7606                     |

|            |                          |    |       |          |
|------------|--------------------------|----|-------|----------|
| Q5T0R9     |                          |    |       |          |
| Q5T0R2     |                          |    |       |          |
| Q5T0R3     |                          |    |       |          |
| Q5T0R4     |                          |    |       |          |
| Q5T0R5     |                          |    |       |          |
| Q5T0R6     |                          |    |       |          |
| Q5T0R7     |                          |    |       |          |
| P01011     | Alpha-1-antichymotrypsin | 31 | 2.364 | 139.9043 |
| G3V3A0     |                          |    |       |          |
| G3V595     |                          |    |       |          |
| P01011-2   |                          |    |       |          |
| O43707     | Alpha-actinin-4          | 36 | 8.56  | 250.2948 |
| O43707-2   |                          |    |       |          |
| H9KV75     |                          |    |       |          |
| P12814     |                          |    |       |          |
| P12814-2   |                          |    |       |          |
| P12814-3   |                          |    |       |          |
| P12814-4   |                          |    |       |          |
| F5GXS2     |                          |    |       |          |
| O43707-3   |                          |    |       |          |
| H7C144     |                          |    |       |          |
| G3V2W4     |                          |    |       |          |
| H0YJ11     |                          |    |       |          |
| H0YJW3     |                          |    |       |          |
| H7C5W8     |                          |    |       |          |
| K7EJH8     |                          |    |       |          |
| G3V2N5     |                          |    |       |          |
| A0A087WSZ2 |                          |    |       |          |
| G3V2E8     |                          |    |       |          |
| G3V2X9     |                          |    |       |          |
| G3V5M4     |                          |    |       |          |

|                                                                                                                          |                      |    |       |          |
|--------------------------------------------------------------------------------------------------------------------------|----------------------|----|-------|----------|
| Q08043                                                                                                                   |                      |    |       |          |
| P06733<br>A0A2R8Y6G6<br>P06733-2<br>K7EM90<br>A0A2R8Y798<br>A0A2R8Y879<br>A0A2R8YEG5<br>A0A2R8YEM5<br>K7ERS8<br>P13929-3 | Alpha-enolase        | 30 | 6.91  | 189.5342 |
| P12429<br>D6RA82<br>D6RFG5<br>D6RCA8<br>D6RAZ8                                                                           | Annexin A3           | 27 | 3.096 | 126.0585 |
| P04114                                                                                                                   | Apolipoprotein B-100 | 61 | 3.15  | 256.5224 |
| P13929<br>E5RG95<br>E5RGZ4<br>E5RI09<br>K7EKN2<br>K7EPM1<br>P13929-2                                                     | Beta-enolase         | 10 | 6.91  | 61.902   |
| P00915<br>E5RFE7<br>E5RHP7<br>E5RJI8<br>E5RG81                                                                           | Carbonic anhydrase 1 | 36 | 9.19  | 138.346  |

|          |                                      |    |       |         |
|----------|--------------------------------------|----|-------|---------|
| E5RH81   |                                      |    |       |         |
| E5RJF6   |                                      |    |       |         |
| H0YBE2   |                                      |    |       |         |
| P08311   | Cathepsin G                          | 25 | 8.23  | 73.2588 |
| Q5VT06   | Centrosome-associated protein<br>350 | 15 | 1.155 | 54.7112 |
| H0Y7F7   |                                      |    |       |         |
| H0Y6Q4   |                                      |    |       |         |
| A2A4F6   |                                      |    |       |         |
| E9PIK0   |                                      |    |       |         |
| H0YD38   |                                      |    |       |         |
| P00450   |                                      |    |       |         |
| E9PFZ2   |                                      |    |       |         |
| H7C5R1   |                                      |    |       |         |
| D6RE86   |                                      |    |       |         |
| P10909   | Clusterin                            | 7  | 5.12  | 31.2289 |
| P10909-2 |                                      |    |       |         |
| P10909-4 |                                      |    |       |         |
| P10909-5 |                                      |    |       |         |
| P10909-3 |                                      |    |       |         |
| H0YAS8   |                                      |    |       |         |
| H0YC35   |                                      |    |       |         |
| E7ERK6   |                                      |    |       |         |
| H0YLK8   |                                      |    |       |         |
| E5RG36   |                                      |    |       |         |
| E5RGB0   |                                      |    |       |         |
| E5RH61   |                                      |    |       |         |
| E5RJZ5   |                                      |    |       |         |
| E7ETB4   |                                      |    |       |         |
| P23528   |                                      |    |       |         |
| E9PK25   |                                      |    |       |         |
| E9PP50   |                                      |    |       |         |

|                                                                            |                                    |    |       |          |
|----------------------------------------------------------------------------|------------------------------------|----|-------|----------|
| G3V1A4<br>E9PLJ3<br>E9PQB7<br>E9PS23<br>Q9Y281<br>Q9Y281-3                 |                                    |    |       |          |
| P12111<br>E7ENL6<br>P12111-2<br>P12111-3<br>P12111-4<br>P12111-5<br>C9JNG9 | Collagen alpha-3(VI) chain         | 14 | 1.10  | 49.3082  |
| A8TX70<br>A8TX70-2<br>E9PAL5<br>H0Y935                                     | Collagen alpha-5(VI) chain         | 18 | 0.42  | 76.5644  |
| Q8IVF4<br>A0A1C7CYW8<br>A0A0J9YY17                                         | Dynein heavy chain 10_<br>axonemal | 21 | 0.25  | 86.0591  |
| Q8TD57<br>Q8TD57-3<br>Q8TD57-2                                             | Dynein heavy chain 3_<br>axonemal  | 16 | 0.85  | 52.6606  |
| Q9NYC9                                                                     | Dynein heavy chain 9_<br>axonemal  | 40 | 0.95  | 147.4929 |
| P02675<br>D6REL8                                                           | Fibrinogen beta chain              | 44 | 3.66  | 257.9515 |
| P06396<br>A0A0A0MS51<br>A0A0A0MT01<br>P06396-2                             | Gelsolin                           | 13 | 5.498 | 84.8484  |

|                                                                        |                                     |     |       |          |
|------------------------------------------------------------------------|-------------------------------------|-----|-------|----------|
| P06396-3<br>P06396-4                                                   |                                     |     |       |          |
| P04792<br>F8WE04<br>C9J3N8                                             | Heat shock protein beta-1           | 29  | 4.87  | 137.4486 |
| P0DOY2<br>P0DOY3<br>A0M8Q6<br>P0CF74<br>A0A0B4J231<br>B9A064<br>P0CG04 | Immunoglobulin lambda<br>constant 2 | 18  | 16.98 | 63.314   |
| P13645                                                                 | Keratin_ type I cytoskeletal 10     | 60  | 7.36  | 333.4504 |
| P02533<br>K7ENW6<br>Q7Z3Y9                                             | Keratin_ type I cytoskeletal 14     | 63  | 11.86 | 295.7665 |
| P19012<br>A8MT21<br>P19012-2<br>C9JTG5<br>Q04695<br>F5GWP8<br>K7EPJ9   | Keratin_ type I cytoskeletal 15     | 98  | 6.789 | 415.8429 |
| P08779                                                                 | Keratin_ type I cytoskeletal 16     | 47  | 13.74 | 377.219  |
| P08727<br>C9JM50<br>K7EMS3                                             | Keratin_ type I cytoskeletal 19     | 73  | 2     | 450.5063 |
| P04264<br>A0A1W2PQU7<br>A0A1W2PRT3<br>A0A1W2PS58                       | Keratin_ type II cytoskeletal 1     | 110 | 6.36  | 412.4752 |

|                                                                                                                                                                      |                                  |     |       |          |
|----------------------------------------------------------------------------------------------------------------------------------------------------------------------|----------------------------------|-----|-------|----------|
| K7EPI4<br>Q6KB66<br>Q6KB66-2<br>Q6KB66-3                                                                                                                             |                                  |     |       |          |
| P19013<br>H0YIC5                                                                                                                                                     | Keratin_ type II cytoskeletal 4  | 134 | 2.43  | 518.8999 |
| P02538                                                                                                                                                               | Keratin_ type II cytoskeletal 6A | 90  | 6.737 | 708.9958 |
| P48668<br>Q01546<br>Q9NSB2<br>A0A087X106<br>B4DIR1<br>F8VS61<br>H0YHD9<br>K7EKH9<br>K7ELP4<br>O43790<br>P78385<br>Q14533<br>Q14CN4<br>Q14CN4-2<br>Q14CN4-3<br>U3KPR1 | Keratin_ type II cytoskeletal 6C | 150 | 4.96  | 700.0887 |
| O95678                                                                                                                                                               | Keratin_ type II cytoskeletal 75 | 52  | 2.54  | 293.3287 |
| Q5XKE5<br>H0YID6                                                                                                                                                     | Keratin_ type II cytoskeletal 79 | 38  | 6.542 | 172.8744 |
| P05787<br>P05787-2<br>F8VUG2<br>F8W1U3<br>A0A1W2PR46                                                                                                                 | Keratin_ type II cytoskeletal 8  | 44  | 7.45  | 274.6775 |

|                                                                                              |                              |    |       |          |
|----------------------------------------------------------------------------------------------|------------------------------|----|-------|----------|
| A0A1X7SBR3<br>A0A1X7SCE1<br>K7EJU1<br>K7EMP8<br>P14136<br>P14136-2<br>P14136-3<br>F8VP67     |                              |    |       |          |
| P02788<br>E7EQB2<br>E7ER44<br>P02788-2<br>C9JCF5                                             | Lactotransferrin             | 75 | 3.098 | 290.4927 |
| P30740<br>P30740-2                                                                           | Leukocyte elastase inhibitor | 37 | 3.43  | 163.1504 |
| P13796<br>P13796-2<br>Q5TBN3<br>A0A0A0MSQ0<br>P13797<br>P13797-2<br>P13797-3<br>U3KQI3       | Plastin-2                    | 44 | 8.77  | 247.5619 |
| Q15149;Q15149-<br>2;Q15149-<br>3;Q15149-<br>4;Q15149-<br>5;Q15149-<br>6;Q15149-<br>7;Q15149- | Plectin                      | 40 | 0.469 | 167.2703 |



|                                                                                    |                                                          |    |        |          |
|------------------------------------------------------------------------------------|----------------------------------------------------------|----|--------|----------|
| 8;Q15149-<br>9;E9PMV1<br>H0YDN1                                                    |                                                          |    |        |          |
| Q07954                                                                             | Prolow-density lipoprotein<br>receptor-related protein 1 | 15 | 1.25   | 66.4491  |
| A0A1B0GUS7                                                                         | Protein unc-13 homolog B                                 | 8  | 0.967  | 30.6686  |
| A0A087WVP1<br>Q14517                                                               | Protocadherin Fat 1                                      | 9  | 0.545  | 27.2938  |
| Q6WKZ4<br>Q6WKZ4-1                                                                 | Rab11 family-interacting<br>protein 1                    | 2  | 1.247  | 7.1718   |
| P29508<br>P29508-2<br>H0Y5H9<br>C9JZ65                                             | Serpin B3                                                | 39 | 9.487  | 310.5015 |
| P04179<br>P04179-2<br>P04179-4<br>P04179-3<br>F5GYZ5<br>F5H3C5<br>F5H4R2<br>G8JLJ2 | Superoxide dismutase [Mn]_<br>mitochondrial              | 6  | 15.765 | 42.06    |
